# Supplementary material
Source: PubMed Central journal article supplement (PMC4583823)
Supplement: NIHMS717224-supplement-3.pdf [file NIHMS717224-supplement-3.pdf]

Supplemental Appendix III

| Obs | Age (yrs) | Gender | Primary Site    | Metastatic Sites               | Whole Lung RT Dose (cGy) | Lung RT Boost Dose (cGy) to primary or metastatic lesions | Any pelvic XRT | Local Control-XRT during any Reporting Period |
|-----|-----------|--------|-----------------|--------------------------------|--------------------------|-----------------------------------------------------------|----------------|-----------------------------------------------|
| 1   | 28        | Male   | Femur           | Bone and/or bone marrow & lung | 1800                     | 2300                                                      | no             | Yes                                           |
| 2   | 12        | Female | Pelvis          | Bone and/or bone marrow & lung | 1500                     | 1800                                                      | yes            | Yes                                           |
| 3   | 17        | Male   | Pelvis          | Lung Only                      | 1500                     | 0                                                         | yes            | Yes                                           |
| 4   | 16        | Male   | Other           | Bone and/or bone marrow        | 0                        | 0                                                         | yes            | Yes                                           |
| 5   | 9         | Male   | Femur           | Bone and/or bone marrow        | 0                        | 0                                                         | no             | Yes                                           |
| 6   | 17        | Male   | Chest Wall      | Bone and/or bone marrow        | 1500                     | 3960 (chest wall)                                         | no             | Yes                                           |
| 7   | 13        | Male   | Pelvis          | Lung Only                      | 1500                     | 0                                                         | yes            | Yes                                           |
| 8   | 6         | Male   | Pelvis          | Bone and/or bone marrow & lung | 1500                     | 0                                                         | yes            | Yes                                           |
| 9   | 22        | Male   | Pelvis          | Lung Only                      | 1500                     | 0                                                         | yes            | Yes                                           |
| 10  | 11        | Male   | Lumbar vertebra | Lung Only                      | 0                        | 0                                                         | no             | No                                            |
| 11  | 15        | Male   | Femur           | Bone and/or bone marrow & lung | 1500                     | 0                                                         | no             | Yes                                           |
| 12  | 12        | Female | Chest Wall      | Bone and/or bone marrow & lung | 1500                     | 3600 (left chest wall)                                    | no             | Yes                                           |
| 13  | 18        | Male   | Chest Wall      | Bone and/or bone marrow & lung | 1500                     | 0                                                         | yes            | Yes                                           |
| 14  | 19        | Female | Pelvis          | Lung, soft tissue              | 0                        | 0                                                         | no             | No                                            |

|    |    |        |            |                                |      |                                       |       |     |
|----|----|--------|------------|--------------------------------|------|---------------------------------------|-------|-----|
| 15 | 12 | Female | Pelvis     | Bone and/or bone marrow & lung | 1527 |                                       | 0 yes | Yes |
| 16 | 18 | Male   | Renal      | Lung, liver                    | 1500 | 2700 (lung)                           | no    | Yes |
| 17 | 13 | Female | Chest Wall | Bone and/or bone marrow & lung | 1500 |                                       | 0 yes | Yes |
| 18 | 27 | Male   | Pelvis     | Pancreas                       | 0    |                                       | 0 yes | Yes |
| 19 | 14 | Female | Scapula    | Bone and/or bone marrow & lung | 1500 |                                       | 0 no  | Yes |
| 20 | 12 | Female | Pelvis     | Bone and/or bone marrow        | 0    |                                       | 0 yes | Yes |
| 21 | 7  | Female | Chest Wall | Lung Only                      | 1500 | 4232 (axilla)                         | no    | Yes |
| 22 | 17 | Male   | Chest Wall | Bone and/or bone marrow        | 0    |                                       | 0 no  | No  |
| 23 | 16 | Female | Chest Wall | Bone and/or bone marrow & lung | 0    | 3600 (right rib)<br>1500 (right lung) | no    | Yes |
| 24 | 16 | Male   | Femur      | Bone and/or bone marrow        | 0    |                                       | 0 no  | Yes |
| 25 | 3  | Male   | Humerus    | Not Reported                   | 0    |                                       | 0 no  | No  |
| 26 | 8  | Female | Pelvis     | Bone and/or bone marrow & lung | 1500 | 2850 (thoracic spine)                 | no    | Yes |
| 27 | 8  | Female | Pelvis     | Bone and/or bone marrow        | 0    |                                       | 0 yes | Yes |
| 28 | 14 | Male   | Pelvis     | Lung Only                      | 1500 |                                       | 0 yes | Yes |
| 29 | 11 | Male   | Pelvis     | Bone and/or bone marrow & lung | 1500 |                                       | 0 yes | Yes |
| 30 | 7  | Female | Pelvis     | Lung Only                      | 1500 |                                       | 0 no  | Yes |
| 31 | 14 | Female | Pelvis     | Bone and/or bone marrow        | 0    |                                       | 0 yes | Yes |

|    |    |        |            |                                      |      |   |     |     |
|----|----|--------|------------|--------------------------------------|------|---|-----|-----|
| 32 | 3  | Male   | Femur      | Bone and/or<br>bone marrow<br>& lung | 1200 | 0 | no  | Yes |
| 33 | 11 | Female | Pelvis     | Bone and/or<br>bone marrow           | 0    | 0 | yes | Yes |
| 34 | 14 | Male   | Chest Wall | Bone and/or<br>bone marrow<br>& lung | 0    | 0 | no  | No  |
| 35 | 5  | Male   | Extremity  | Bone and/or<br>bone marrow           | 0    | 0 | no  | No  |

| Local Control-Surgery to primary site | Pulmonary Toxicity /Grade           | Hemorrhagic Cystitis | Type of Analytic Event                                                | Days from Enrollment to 1st Analytic Event | Days from Enrollment to Last Contact | Status at Last Contact |
|---------------------------------------|-------------------------------------|----------------------|-----------------------------------------------------------------------|--------------------------------------------|--------------------------------------|------------------------|
| No                                    | No                                  | No                   | Relapse                                                               | 263                                        | 369                                  | Dead                   |
| No                                    | Yes/4                               | No                   | Death reported due to cardiac failure, secondary to pulmonary process | 314                                        | 314                                  | Dead                   |
| No                                    | No                                  | No                   | No Event                                                              | .                                          | 1685                                 | Alive                  |
| No                                    | No                                  | No                   | Relapse                                                               | 297                                        | 461                                  | Dead                   |
| No                                    | No                                  | No                   | Relapse                                                               | 420                                        | 510                                  | Dead                   |
| Yes                                   | Yes/3 (XRT after toxicity occurred) | No                   | SMN                                                                   | 965                                        | 965                                  | Alive                  |
| No                                    | No                                  | Yes                  | No Event                                                              | .                                          | 1055                                 | Alive                  |
| No                                    | No                                  | Yes                  | Relapse                                                               | 686                                        | 1102                                 | Dead                   |
| No                                    | No                                  | No                   | No Event                                                              | .                                          | 1200                                 | Alive                  |
| Yes                                   | No                                  | No                   | No Event                                                              | .                                          | 1098                                 | Alive                  |
| No                                    | Yes/4                               | Yes                  | Relapse                                                               | 256                                        | 389                                  | Dead                   |
| Yes                                   | Yes/5                               | No                   | Death                                                                 | 256                                        | 256                                  | Dead                   |
| Yes                                   | No                                  | Yes                  | No Event                                                              | .                                          | 1069                                 | Alive                  |
| No                                    | No                                  | No                   | Relapse                                                               | 458                                        | 458                                  | Dead                   |

|     |       |     |          |     |     |       |
|-----|-------|-----|----------|-----|-----|-------|
| No  | No    | No  | Relapse  | 386 | 524 | Dead  |
| Yes | No    | No  | Relapse  | 237 | 468 | Dead  |
| Yes | No    | No  | No Event |     | 909 | Alive |
| No  | No    | No  | Relapse  | 330 | 382 | Dead  |
| Yes | Yes/5 | No  | Death    | 352 | 352 | Dead  |
| No  | No    | No  | Relapse  | 620 | 690 | Dead  |
| No  | Yes/4 | No  | Relapse  | 452 | 725 | Dead  |
| Yes | No    | No  | Relapse  | 64  | 161 | Dead  |
| Yes | Yes/4 | No  | Relapse  | 497 | 612 | Dead  |
| No  | No    | No  | Relapse  | 494 | 621 | Dead  |
| Yes | No    | No  | Relapse  | 444 | 881 | Alive |
| No  | No    | No  | SMN      | 621 | 776 | Dead  |
| No  | No    | No  | Relapse  | 527 | 527 | Alive |
| No  | No    | No  | Relapse  | 496 | 847 | Alive |
| No  | No    | Yes | No Event |     | 523 | Alive |
| Yes | No    | No  | No Event |     | 585 | Alive |
| No  | No    | Yes | No Event |     | 850 | Alive |

|     |       |    |          |     |     |       |
|-----|-------|----|----------|-----|-----|-------|
| No  | Yes/3 | No | No Event | .   | 648 | Alive |
| No  | No    | No | No Event | .   | 654 | Alive |
| No  | No    | No | Relapse  | 504 | 504 | Dead  |
| Yes | No    | No | No Event | .   | 677 | Alive |
